# Supplementary material for: Ionizing Radiation Sensing with Functionalized and Copper-Coated SWCNT/PMMA Thin Film Nanocomposites
Source: MDPI journal article supplement (doi:10.3390/nano13192653), 2023-09-27
Supplement: s1 [file s1]

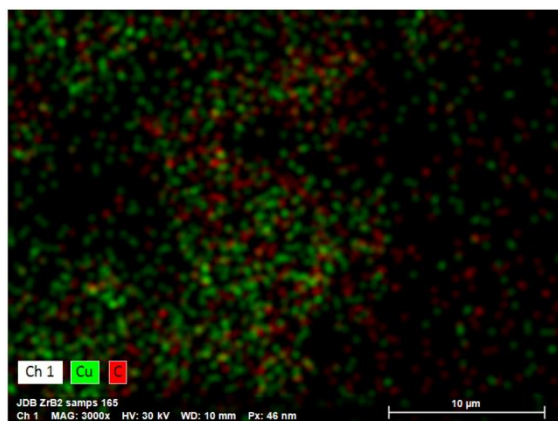

**Figure S1.** Shows the EDS characterization of thin copper-coated SWCNT/PMMA thin-film composite. This confirms the presence of functional group with Cu in the copper-coated SWCNT/PMMA composite.

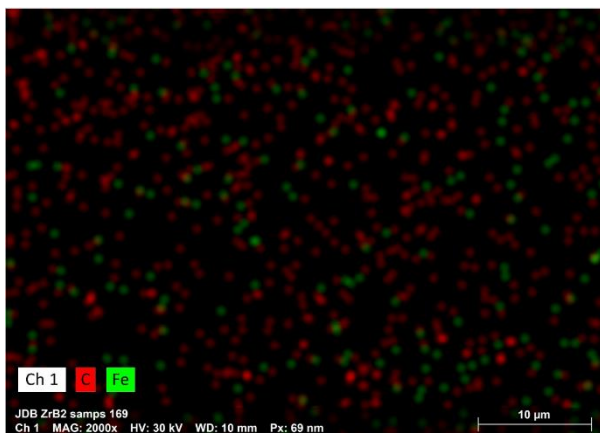

**Figure S2.** Shows the EDS characterization of the ferrocene-doped-SWCNT/PMMA. This confirms that ferrocene is present in the ferrocene doped-SWCNT/PMMA composite.
